# Supplementary material for: Hydroxyl terminated mesoporous silica-assisted dispersion of ligand-free CsPbBr3/Cs4PbBr6 nanocrystals in polymer for stable white LED
Source: Royal Society of Chemistry journal article supplement (doi:10.1039/c8nr08778d), 2018-12-18
Supplement: c8nr08778d1.pdf [file c8nr08778d1.pdf]

Supporting Information

## Hydroxyl Terminated Mesoporous Silica Assisted Dispersion of Ligand-Free CsPbBr<sub>3</sub>/Cs<sub>4</sub>PbBr<sub>6</sub> Nanocrystals in Polymer for Stable White LED

Mei Su,<sup>†, ‡, §</sup> Bo Fan,<sup>†</sup> Haiyang Li,<sup>†</sup> Kai Wang<sup>\*, §</sup> and Zhongkuan Luo<sup>\*, †</sup>

<sup>†</sup>College of Chemistry and Environmental Engineering, Shenzhen University, Shenzhen 518060, P. R. China.

<sup>‡</sup>Key Laboratory of Optoelectronic Devices and Systems of Ministry of Education and Guangdong Province, College of Optoelectronic Engineering, Shenzhen University, Shenzhen 518060, P. R. China.

<sup>§</sup>Southern University of Science and Technology, Shenzhen, 518055, P. R. China.

\*Email: luozhongkuan@126.com, wangk@sustc.edu.com.

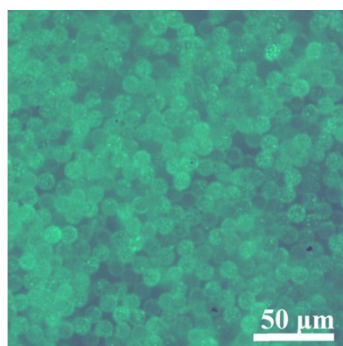

**Figure S1.** Optical microscope image of composite obtained in the presence of silica terminated with -OH wherein the solvent is extracted by a large amount of toluene under the illumination of UV light (365 nm).

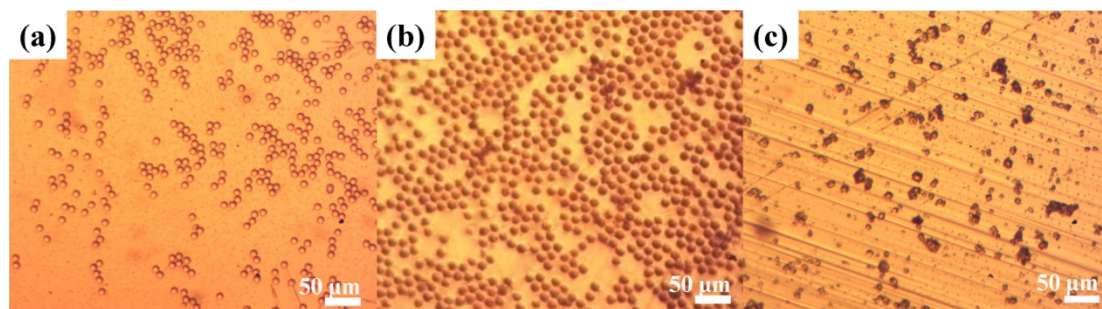

**Figure S2.** Optical microscope image of mesoporous silica before (a), after (b) the loading of composite materials, and that of exposed sample (c).

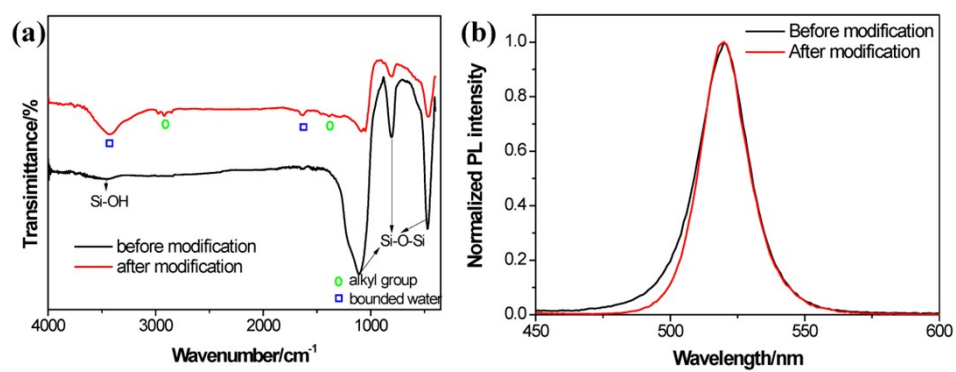

**Figure S3.** FTIR spectrum (a) and PL spectrum (b) of embedded composite before and after the modification with alkyl chain.
